# Supplementary material
Source: PubMed Central journal article supplement (PMC9096814)

## **Supplemental Information**

### **Molecular Features of CA-074 pH-Dependent Inhibition of Cathepsin B**

Michael C. Yoon<sup>1,2</sup>, Mitchell Christy<sup>3</sup>, Von Phan<sup>1,2</sup>, William Gerwick<sup>3</sup>, Gregory Hook<sup>4</sup>,  
Anthony J. O'Donoghue<sup>1\*</sup>, and Vivian Hook<sup>1,5\*</sup>

<sup>1</sup>Skaggs School of Pharmacy and Pharmaceutical Sciences, University of California, San Diego, La Jolla, CA; <sup>2</sup>Biomedical Sciences Graduate Program, University of California, San Diego, La Jolla, CA; <sup>3</sup>Scripps Institution of Oceanography, University of California, San Diego, La Jolla, CA; <sup>4</sup>American Life Sciences Pharmaceuticals, Inc., La Jolla, CA; <sup>5</sup>Department of Neurosciences and Department of Pharmacology, School of Medicine, University of California, San Diego, La Jolla, CA

**Figure S1. Irreversible mechanism of CA-074Me inhibition of cathepsin B at pH 4.6, pH 5.5, and pH 7.2.** CA-074Me at pH 4.6 (panel a), pH 5.5 (panel b), and pH 7.2 (panel c) was evaluated for irreversible or reversible inhibition of cathepsin B. Cathepsin B was pre-incubated with inhibitor at 10 times the  $IC_{50}$  concentration (consisting of CA-074Me at 90  $\mu$ M at pH 4.6, 137  $\mu$ M at pH 5.5, and 75 nM at pH 7.2), followed by dilution to 1/10 the  $IC_{50}$  concentration, addition of substrate (Z-F-R-AMC), and measurement of activity in time-course assays. Inhibition of cathepsin B following dilution indicates the irreversible inhibitory mechanism of CA-074Me.

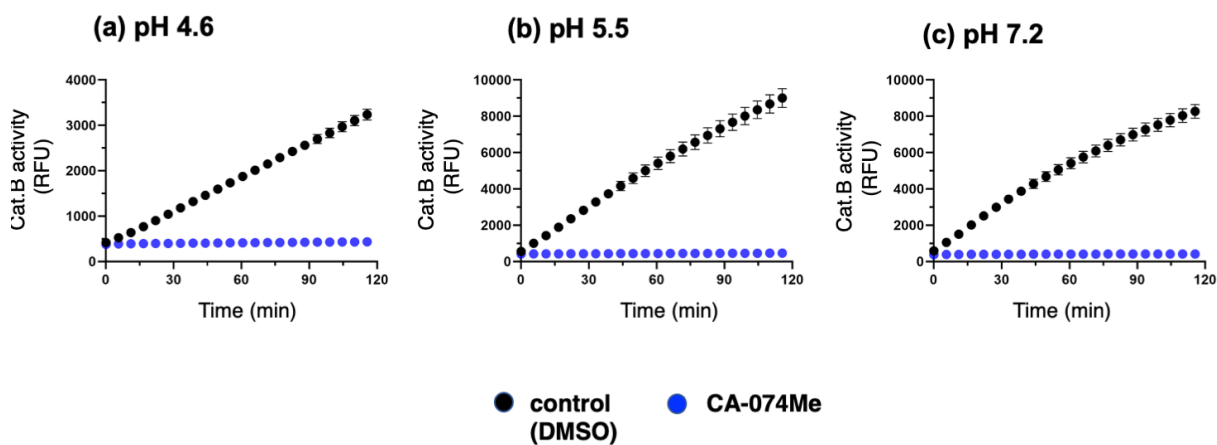

**Figure S2. Kinetic analysis of CA-074 inhibition of cathepsin B at acidic to neutral pH conditions.** Cathepsin B activity was monitored in time-course assays at different concentrations of CA-074, conducted at pH 4.6 (panel a), pH 5.5 (panel b), and pH 7.2 (panel c). Values for  $k_{obs}$  were calculated by Prism using the equation  $Y=Y_0*e^{(-k_{obs}*X)}$  where X is time and Y/Y<sub>0</sub> is activity (measured as slope of RFU vs time) with inhibitor relative to activity with no inhibitor. The  $k_{obs}$  values were used to calculate  $k_{inact}$  and  $K_i$  values by plotting  $k_{obs}$  vs inhibitor concentration (shown in Figure 3).

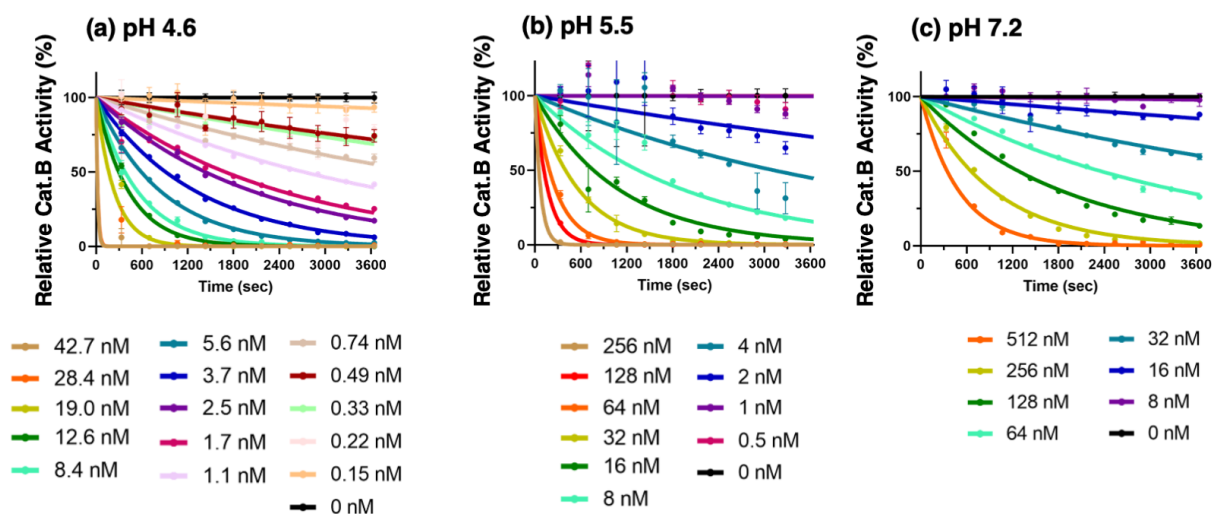

**Figure S3. Kinetic analysis of CA-074Me inhibition of cathepsin B at acidic to neutral pH conditions.**

(a) to (c). CA-074Me and cathepsin B in kinetic studies for  $k_{obs}$  values. Cathepsin B activity was monitored in time-course assays at different concentrations of CA-074, conducted at pH 4.6 (panel a), pH 5.5 (panel b), and pH 7.2 (panel c). Values for  $k_{obs}$  were calculated by the equation  $Y=Y_0*e^{(-k_{obs}*X)}$  where X is time and Y/Y<sub>0</sub> is activity with inhibitor relative to activity with no inhibitor. The  $k_{obs}$  values were used to calculate  $k_{inact}$  and  $K_I$  values by plotting  $k_{obs}$  vs inhibitor concentration (shown in d-f).

(d) to (f). CA-074Me inhibition of cathepsin B kinetics for  $K_I$ ,  $k_{inact}$ , and  $k_{inact}/K_I$  values. Kinetic analyses of CA-074Me inhibition of cathepsin B was conducted at pH 4.6 (panel d), pH 5.5 (panel e), and pH 7.2 (panel f) to determine  $K_I$ ,  $k_{inact}$ , and  $k_{inact}/K_I$  values, conducted as described in the methods.

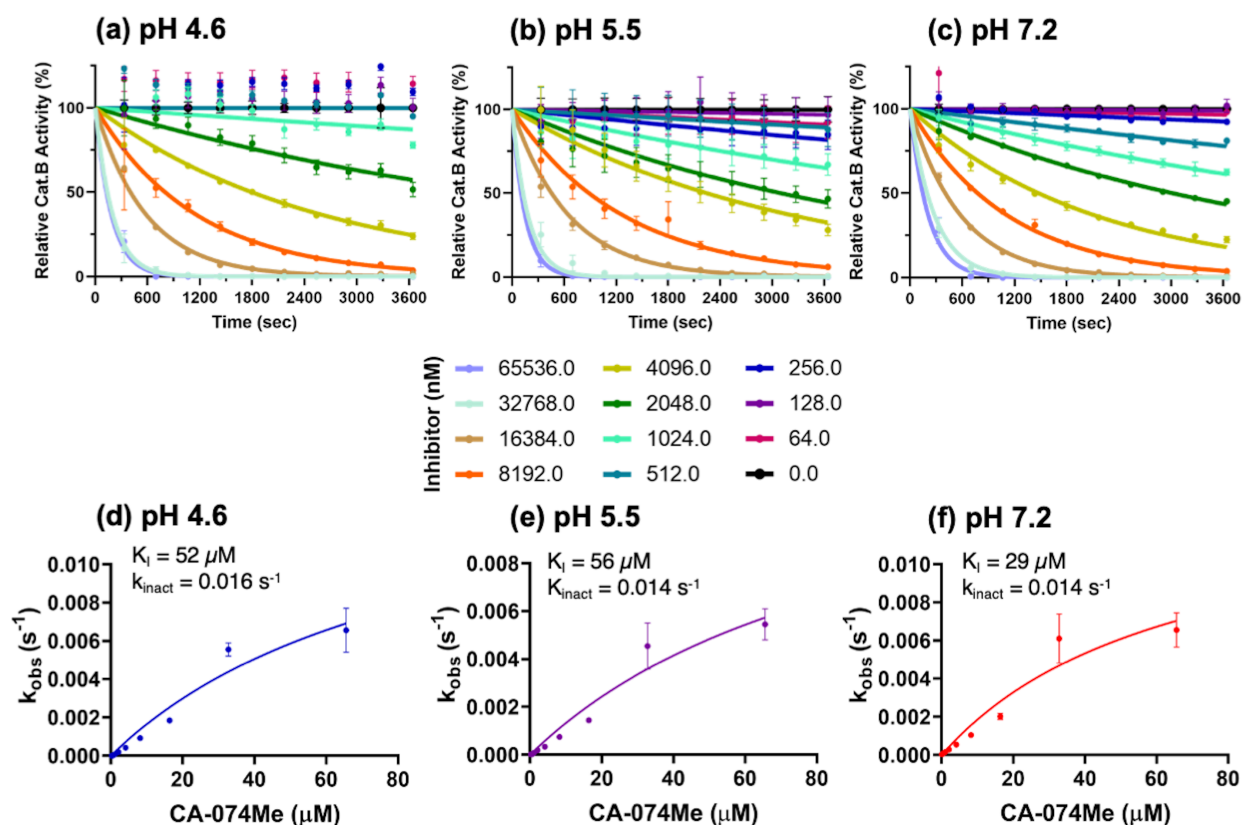

### Figure S4. Binding energy of CA-074 bound to cathepsin B at pH 4.6.

Components comprising the binding energy of CA-074 binding to cathepsin B at pH 4.6 were assessed by the MOE docking software. Energies of the binding interactions of the inhibitor with the enzyme (specific residues are indicated) are shown, combined with the total binding energy indicated as -58.3 kcal/mol.

#### Ligand Interactions Report

Mon Oct 12 12:58:04 2020 (MOE 2019.01)

1QDQ: HYDROLASE / 1QDQ: HYDROLASE

| Inhibitor | Enzyme             | Interaction | Distance | E (kcal/mol) |
|-----------|--------------------|-------------|----------|--------------|
| N1        | 11 O GLY 198 (A)   | H-donor     | 2.84     | -2.0         |
| O2        | 17 O HOH 399 (A)   | H-donor     | 2.61     | -1.6         |
| C6        | 19 O GLY 198 (A)   | H-donor     | 3.37     | -0.5         |
| O1        | 14 N GLY 74 (A)    | H-acceptor  | 3.04     | -2.3         |
| O2        | 17 O HOH 282 (A)   | H-acceptor  | 2.86     | -1.2         |
| O3        | 22 NE2 GLN 23 (A)  | H-acceptor  | 2.90     | -1.4         |
| O3        | 22 N CYS 29 (A)    | H-acceptor  | 3.26     | -1.9         |
| O4        | 28 NE1 TRP 221 (A) | H-acceptor  | 2.89     | -4.2         |
| O         | 46 O HOH 388 (A)   | H-acceptor  | 2.62     | -1.1         |
| O         | 46 O HOH 395 (A)   | H-acceptor  | 2.65     | -3.3         |
| OT        | 56 ND1 HIS 110 (A) | H-acceptor  | 2.70     | -11.2        |
| OT        | 56 NE2 HIS 111 (A) | H-acceptor  | 2.73     | -10.9        |
| O         | 46 NE2 HIS 111 (A) | Ionic       | 3.19     | -3.3         |
| OT        | 56 ND1 HIS 110 (A) | Ionic       | 2.70     | -6.8         |
| OT        | 56 NE2 HIS 111 (A) | Ionic       | 2.73     | -6.6         |

CA074:  
Bound @ pH4.6

Total Interactions:  
-58.3 kcal/mol

Nuc-E Distance: N/Å

### Figure S5. Binding energy of CA-074 bound to cathepsin B at pH 7.2.

Components comprising the binding energy of CA-074 binding to cathepsin B at pH 7.2 were assessed by the MOE docking software. Energies of the binding interactions of the inhibitor with the enzyme (residues are indicated) are shown, combined with the total binding energy indicated as -43.0 kcal/mol.

#### Ligand Interactions Report

Mon Oct 12 13:33:09 2020 (MOE 2019.01)

1QDQ: HYDROLASE / 1QDQ: HYDROLASE

| Inhibitor | Enzyme      | Interaction    | Distance | E (kcal/mol) |
|-----------|-------------|----------------|----------|--------------|
| N1 11     | O GLY 198   | (A) H-donor    | 2.84     | -2.0         |
| O2 17     | O HOH 399   | (A) H-donor    | 2.61     | -1.6         |
| O1 14     | N GLY 74    | (A) H-acceptor | 3.04     | -2.3         |
| O2 17     | O HOH 282   | (A) H-acceptor | 2.87     | -1.2         |
| O3 22     | NE2 GLN 23  | (A) H-acceptor | 2.90     | -1.3         |
| O3 22     | N CYS 29    | (A) H-acceptor | 3.26     | -1.9         |
| O4 28     | NE1 TRP 221 | (A) H-acceptor | 2.90     | -4.4         |
| O 46      | O HOH 388   | (A) H-acceptor | 2.61     | -1.1         |
| O 46      | O HOH 395   | (A) H-acceptor | 2.62     | -3.1         |
| OT 56     | ND1 HIS 110 | (A) H-acceptor | 2.69     | -11.1        |
| OT 56     | NE2 HIS 111 | (A) H-acceptor | 2.83     | -6.1         |
| OT 56     | ND1 HIS 110 | (A) Ionic      | 2.69     | -6.9         |

CA074:  
Bound @ pH7.2

Total Interactions:  
-43.0 kcal/mol

Nuc-E Distance: N/Å

**Figure S6.  $K_m$  plots for cathepsin B and cysteine cathepsins at pH 4.6, 5.5, and 7.2.**

$K_m$  values were determined for cathepsin B (panel a) and the cysteine cathepsins (cathepsins C, H, L, K, S, V, and X with each of their indicated substrates, shown in panels b, c, d, e, f, g, and h, respectively). Michaelis-Menten kinetics was used for  $K_m$  data analysis (conducted as described in the methods) using the equation  $v_0 = V_{max} * [S] / (K_m + [S])$  with curve-fitting using Prism 9. Cathepsin L and cathepsin X had no activity at pH 7.2 and, therefore,  $K_m$  was determined for pH 4.6 and 5.5.

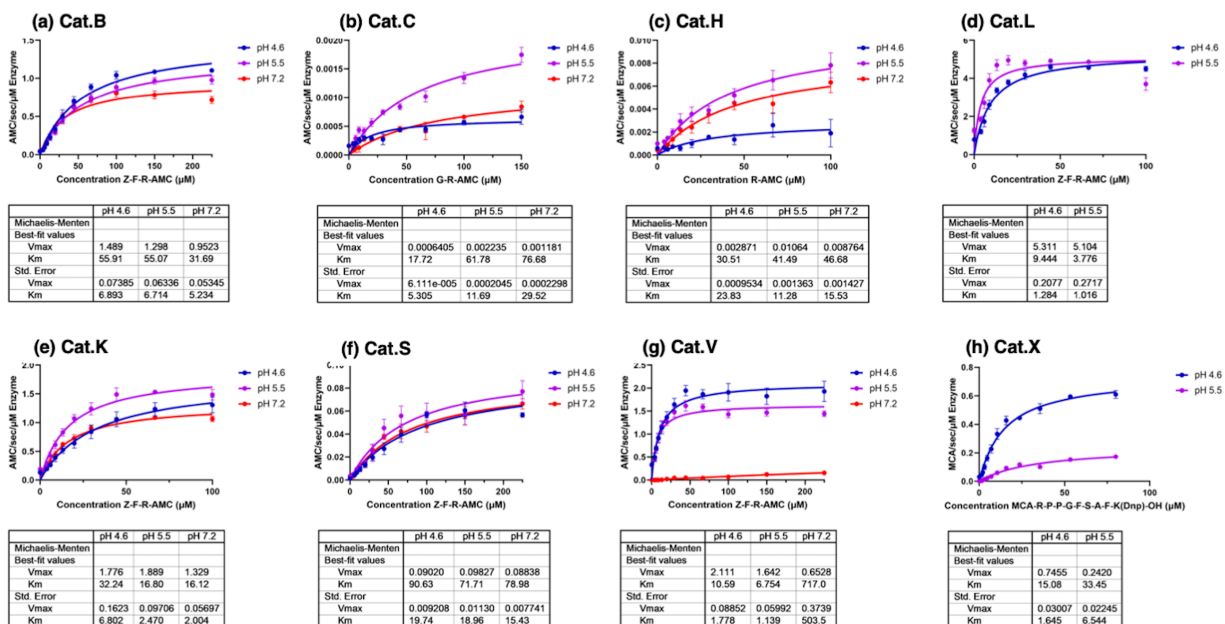

Supplement: NIHMS1801421-supplement-SI_Figures_S1-S6.pdf [file NIHMS1801421-supplement-SI_Figures_S1-S6.pdf]
